# Supplementary material
Source: ML conference proceedings conference paper supplement (https://openaccess.thecvf.com/content/WACV2021/html/Battan_GlocalNet_Class-Aware_Long-Term_WACV_2021_paper.html)
Supplement: Supplementary file 2 [file Battan_GlocalNet_Class-Aware_Long-Term_WACV_2021_supplemental.zip]

## Supplementary Material of "GlocalNet: Class-aware Long-term Human Motion Synthesis"

### Performance on Individual Classes

Across all the classes in the dataset NTU RGB+D(3D) the average Euclidean distance across all the classes is 0.17 and the Standard Deviation is 0.06. We provide the results of top-5 and bottom-5 performing classes in Table 1 and 2, respectively.

Although the reconstruction error on bottom-5 classes was high, we observed generated sequences were quite reasonable in terms of qualitative visualization but definitely not coherent with respect to Ground Truth.

| Class                  | Euclidean Distance |
|------------------------|--------------------|
| Playing with Phone     | 0.079              |
| Shake Head             | 0.080              |
| Typing On Keyboard     | 0.093              |
| Put the Palms together | 0.095              |
| Drop                   | 0.106              |

Table 1: Performance of top-5 classes on NTU RGB+D(3D) in terms on Euclidean Loss.

| Class       | Euclidean Distance |
|-------------|--------------------|
| Wear Jacket | 0.345              |
| Throw       | 0.292              |
| Hugging     | 0.279              |
| Nausea      | 0.263              |
| Punching    | 0.263              |

Table 2: Performance of bottom-5 classes on NTU RGB+D(3D) in terms on Euclidean Loss.

### Performance without Class Prior

Our Method shows better performance than previous SOTA models even without the supervision of class prior. However, as visible in Figure 1 the subspace is significantly cluttered when we don't use the class prior as compared to the embedding diagram from main paper (refer Figure 6).

| Models              | cross-view             |                        | cross-subject          |                        |
|---------------------|------------------------|------------------------|------------------------|------------------------|
|                     | $MMD_{avg} \downarrow$ | $MMD_{seq} \downarrow$ | $MMD_{avg} \downarrow$ | $MMD_{seq} \downarrow$ |
| Without Class-prior | 0.226                  | 0.231                  | 0.186                  | 0.193                  |
| Our Method          | <b>0.195</b>           | <b>0.197</b>           | <b>0.177</b>           | <b>0.187</b>           |

Table 3: Performance without Class label in terms of MMD on NTU RGB+D(2D).

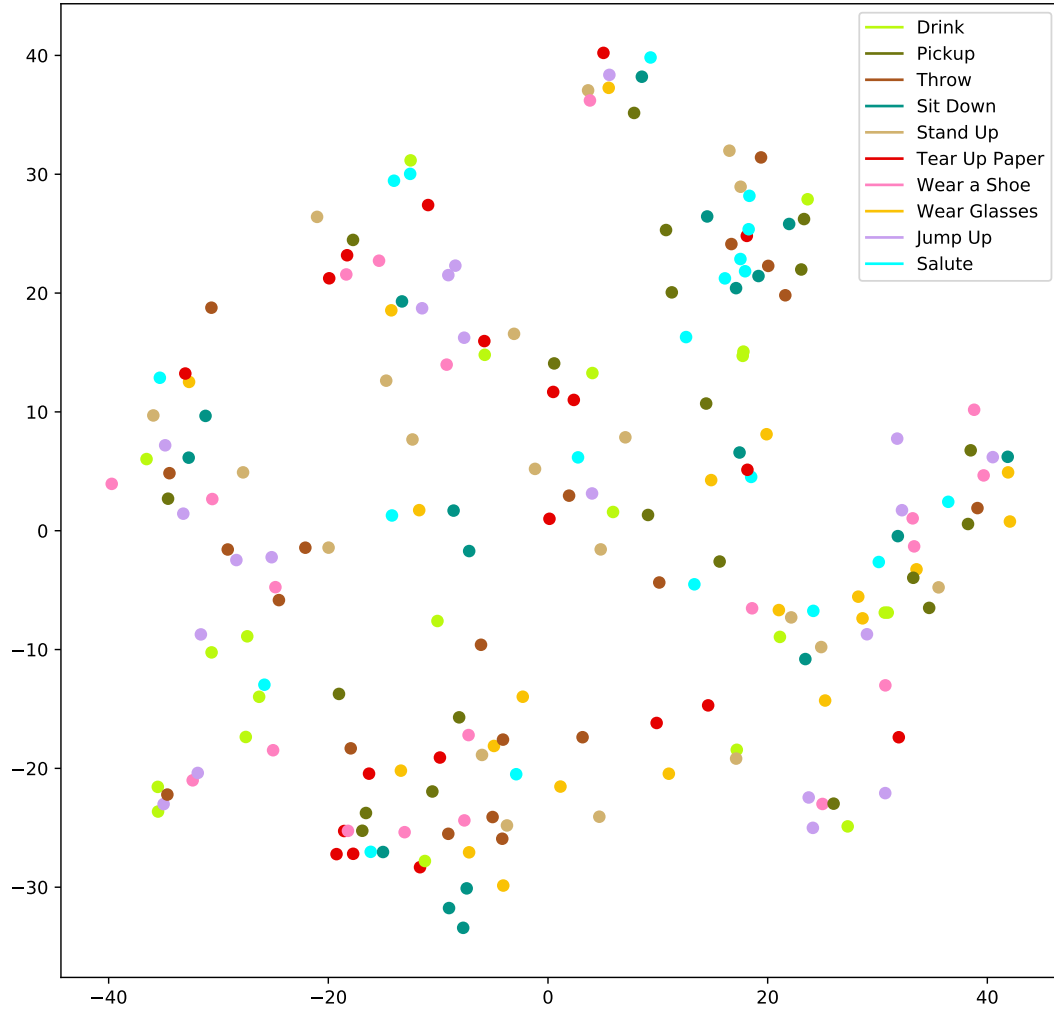

Figure 1: The t-SNE plot of embedding subspace without using the input class label, here samples for different classes are represented as color-coded 3D points.
