# Supplementary material
Source: ML conference proceedings conference paper supplement (https://openaccess.thecvf.com/content/WACV2021/html/Battan_GlocalNet_Class-Aware_Long-Term_WACV_2021_paper.html)
Supplement: Supplementary file 3 [file Battan_GlocalNet_Class-Aware_Long-Term_WACV_2021_supplemental.zip]

Archive with 4 entries (4 files):
- 1267-supp.mp4
- __MACOSX/._1267-supp.mp4
- 1267-supp.pdf
- __MACOSX/._1267-supp.pdf
